# Supplementary material for: Three-Dimensional Numerical Analysis and Operational Optimization of High-Efficiency Sedimentation Tank
Source: MDPI journal article supplement (doi:10.3390/w15203656), 2023-10-18
Supplement: s1 [file s1]

Archive with 1 entries (1 files):
- water-2635042-supplementary.pdf
