# Supplementary material for: Three-Dimensional Numerical Analysis and Operational Optimization of High-Efficiency Sedimentation Tank
Source: MDPI journal article supplement (doi:10.3390/w15203656), 2023-10-18
Supplement: s1 [file s1 › water-2635042-supplementary.pdf]

# Supplementary Materials: Three-dimensional numerical analysis and operational optimization of high-efficiency sedimentation tank

Zhian Ye <sup>1</sup>, Shaoxin Kang <sup>1,\*</sup>, Zhengjiang Wang <sup>1</sup>, Qi Jiang <sup>1</sup>, Jiangtao Zhang <sup>1</sup>, Bin Zheng <sup>2</sup>, Jinlei Wang <sup>2,\*</sup>

<sup>1</sup> State Key Laboratory of High-Efficiency Flexible Coal Power Generation and Carbon Capture Utilization and Storage, Xi'an TPRI Water-Management and Environmental Protection Co. Ltd., Xi'an 710032, P. R. China

<sup>2</sup> School of Materials Science and Engineering, Xi'an University of Science and Technology, Xi'an 710054, P. R. China

\* Correspondence: [kangshaoxin@tpri.com.cn](mailto:kangshaoxin@tpri.com.cn) (S. K.); [jlwang@xust.edu.cn](mailto:jlwang@xust.edu.cn) (J. W.)

**Citation:** To be added by editorial staff during production.

Academic Editor: Firstname Last-name

Received: date

Revised: date

Accepted: date

Published: date

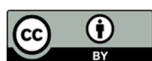

**Copyright:** © 2023 by the authors.

Submitted for possible open access publication under the terms and conditions of the Creative Commons Attribution (CC BY) license (<https://creativecommons.org/licenses/by/4.0/>).

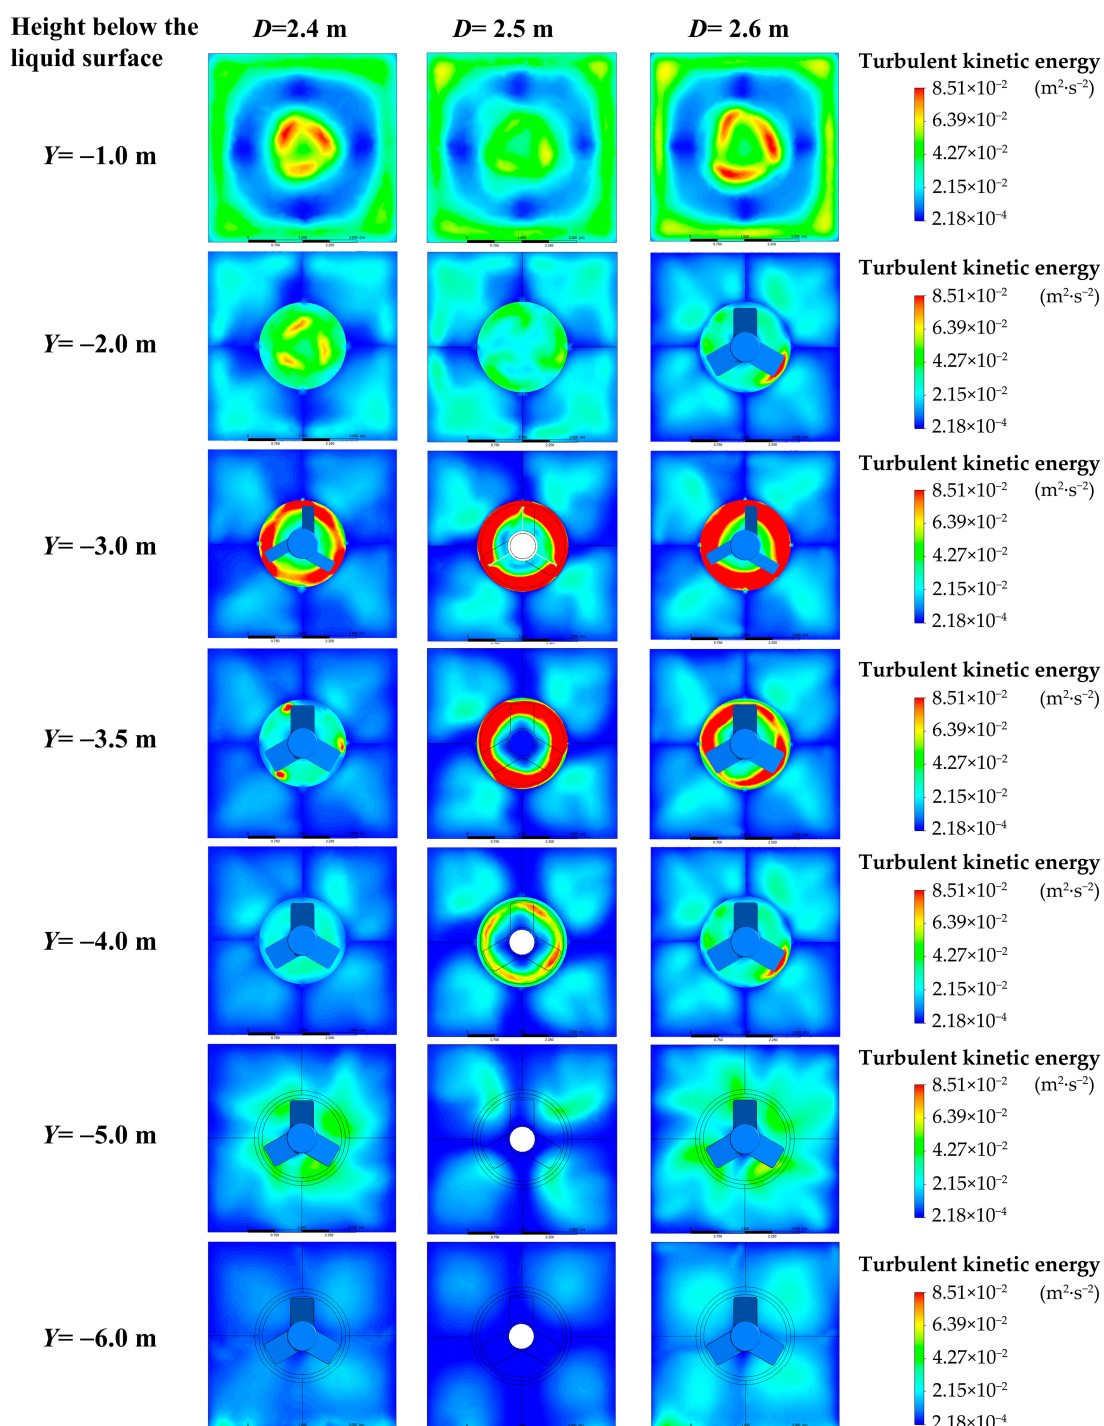

**Figure S1.** Distributions of turbulent kinetic energy in different cross-sections for various draft tube diameters  $D$ .

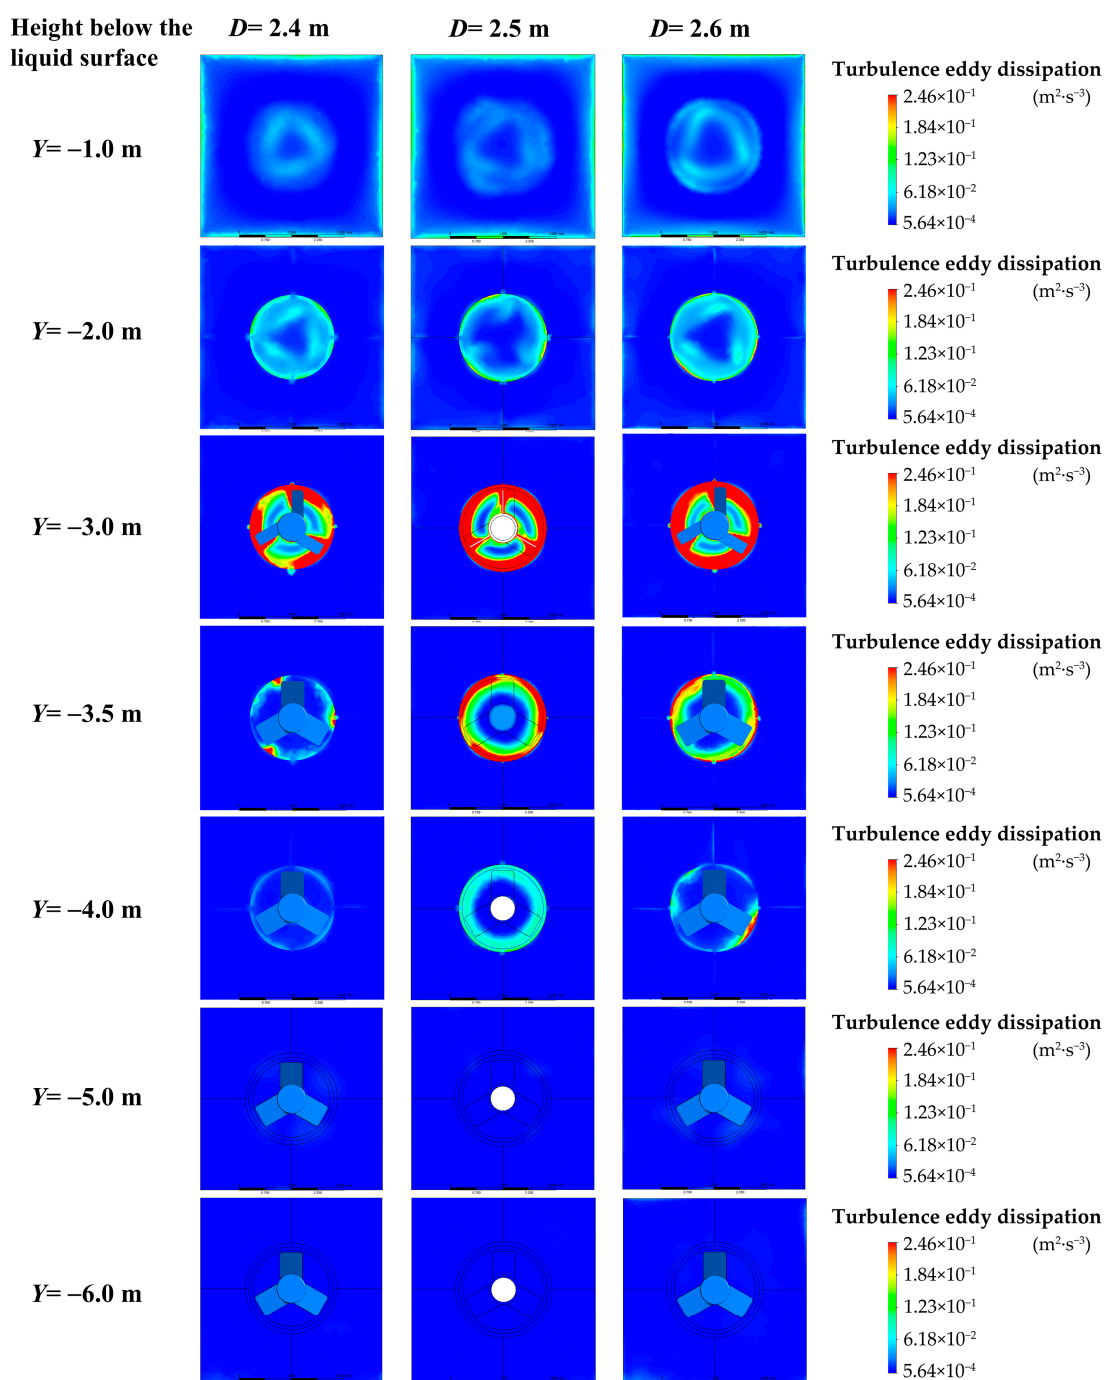

**Figure S2.** Distributions of turbulent kinetic energy dissipation rate in different cross-sections for various draft tube diameters  $D$ .

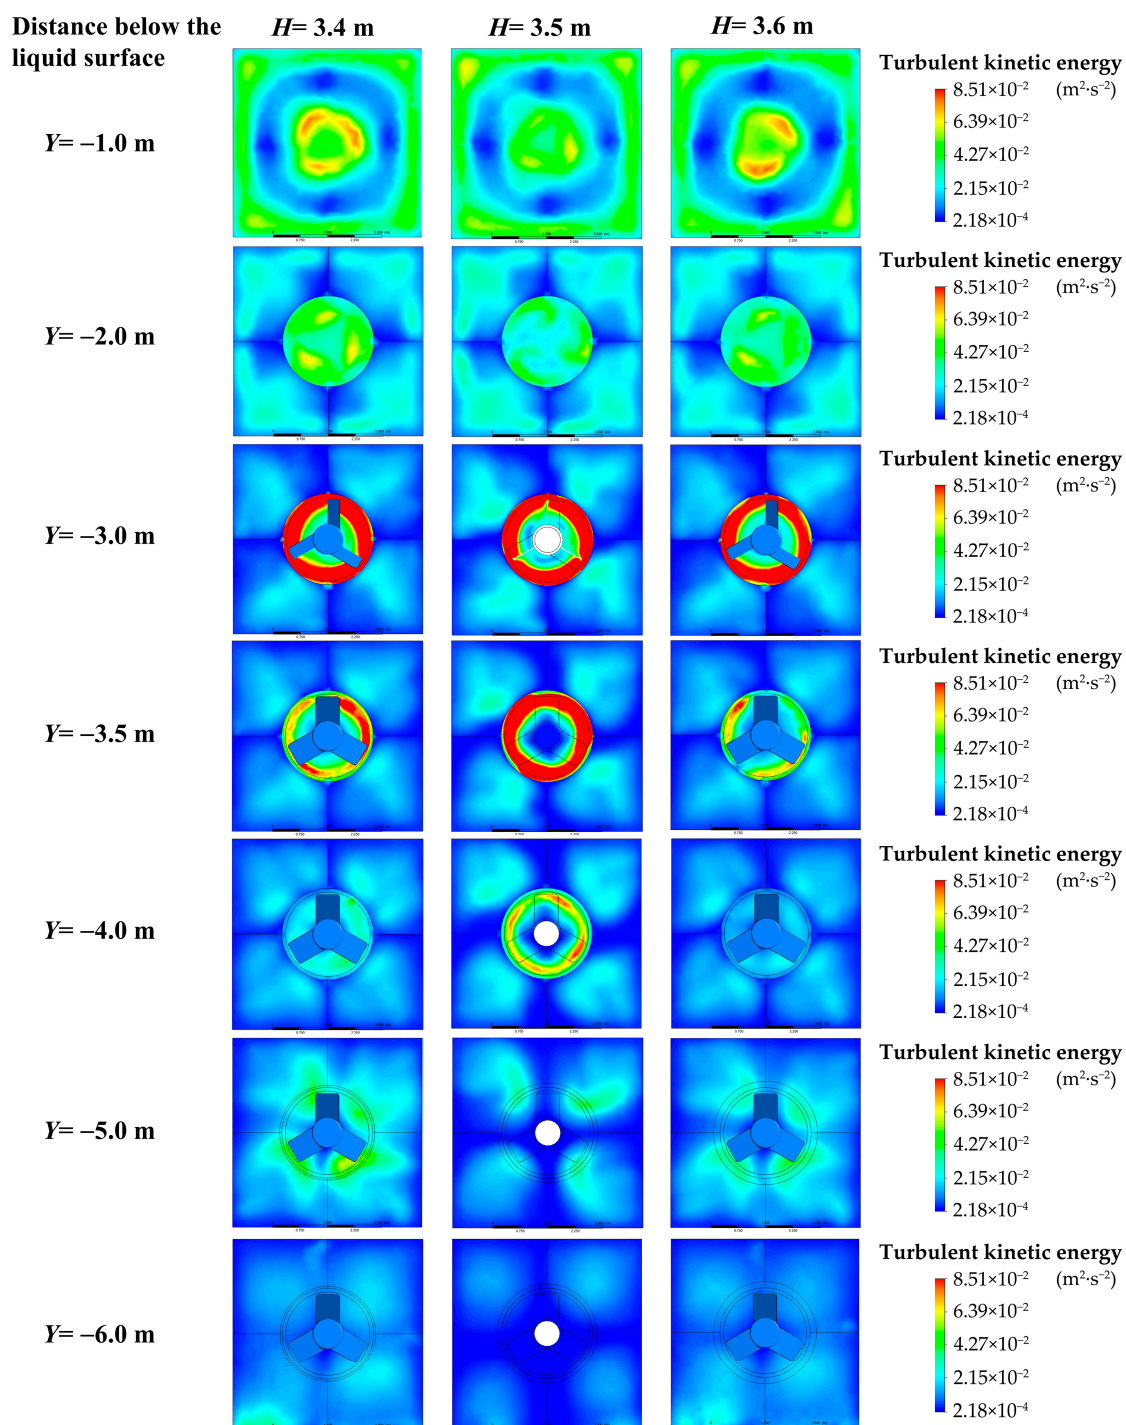

**Figure S3.** Distributions of turbulent kinetic energy in different cross-sections for various draft tube heights  $H$ .

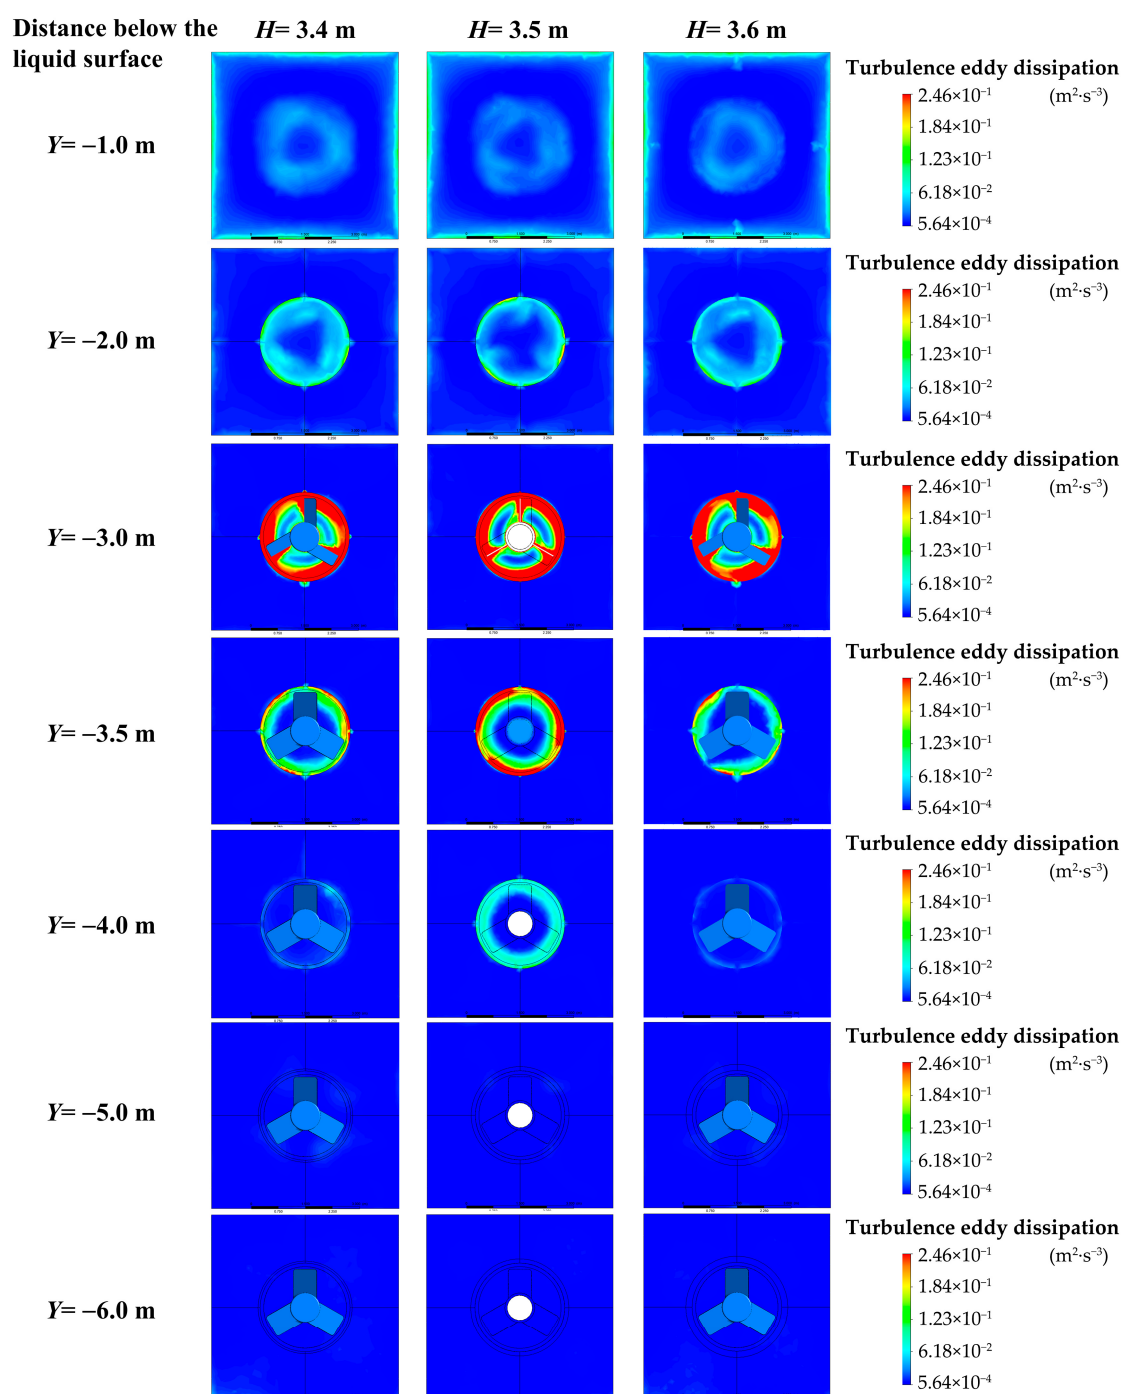

**Figure S4.** Distributions of turbulent kinetic energy dissipation rate in different cross-sections for various draft tube heights  $H$

**Table S1.** Effect of water-retaining weir height  $l$  on average turbulent kinetic energy  $k$  and average turbulent kinetic energy dissipation rate  $\varepsilon$  in plug-flow/clarification zone.

| Height of water-retaining weir (m) | Turbulent kinetic energy $k$<br>( $10^{-4} \text{ m}^2 \cdot \text{s}^{-2}$ ) | Dissipation rate $\varepsilon$<br>( $10^{-4} \text{ m}^2 \cdot \text{s}^{-3}$ ) |
|------------------------------------|-------------------------------------------------------------------------------|---------------------------------------------------------------------------------|
| 1.5                                | 0.7618                                                                        | 0.1246                                                                          |
| 1.6                                | 0.7533                                                                        | 0.1205                                                                          |
| 1.7                                | 0.7515                                                                        | 0.1221                                                                          |
